# Supplementary material for: Activated p53 with Histone Deacetylase Inhibitor Enhances L-Fucose-Mediated Drug Delivery through Induction of Fucosyltransferase 8 Expression in Hepatocellular Carcinoma Cells
Source: PubMed Central journal article supplement (PMC5158067; doi:10.1371/journal.pone.0168355), 2016-12-15
Supplement: pone.0168355.s001.pdf [file pone.0168355.s001.pdf]

**A HepG2**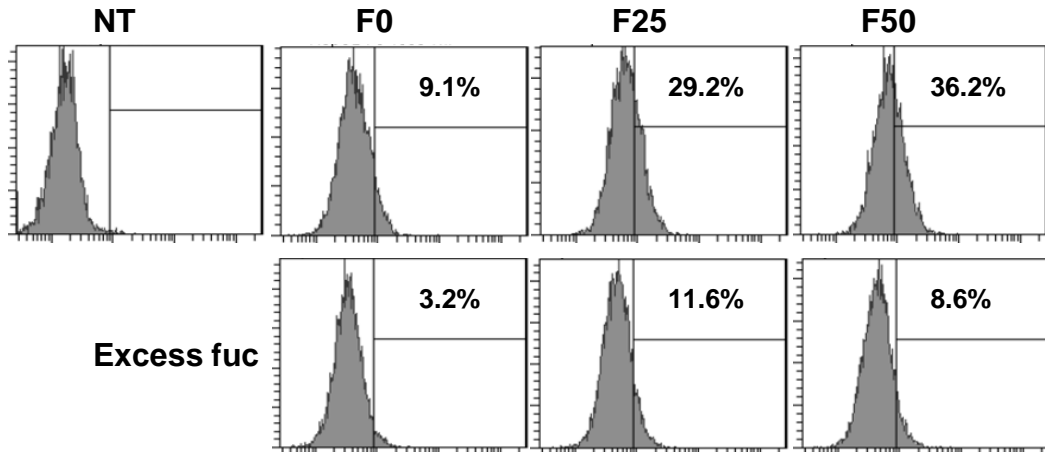**B JHH7**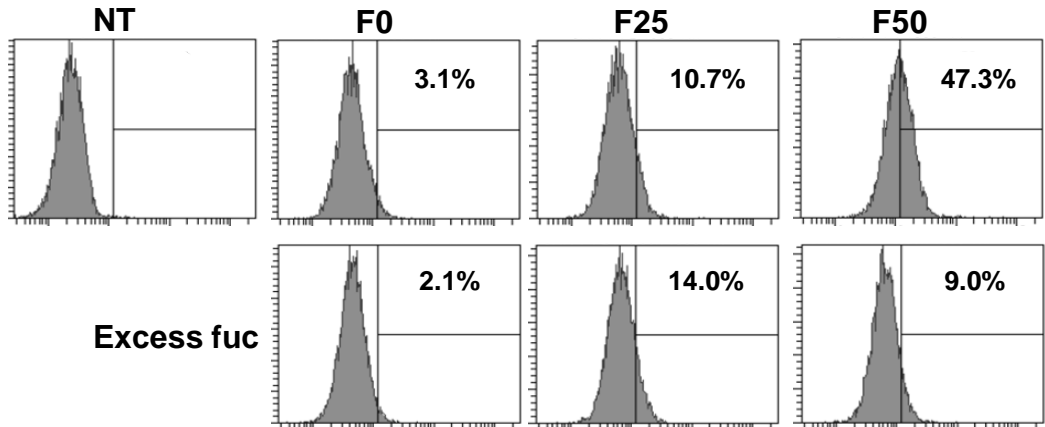**C JHH6**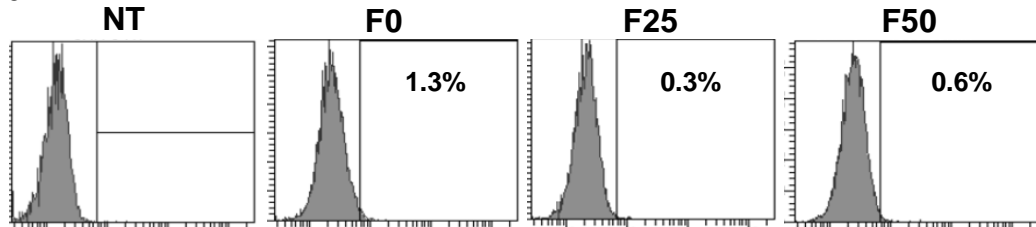**D JHH7**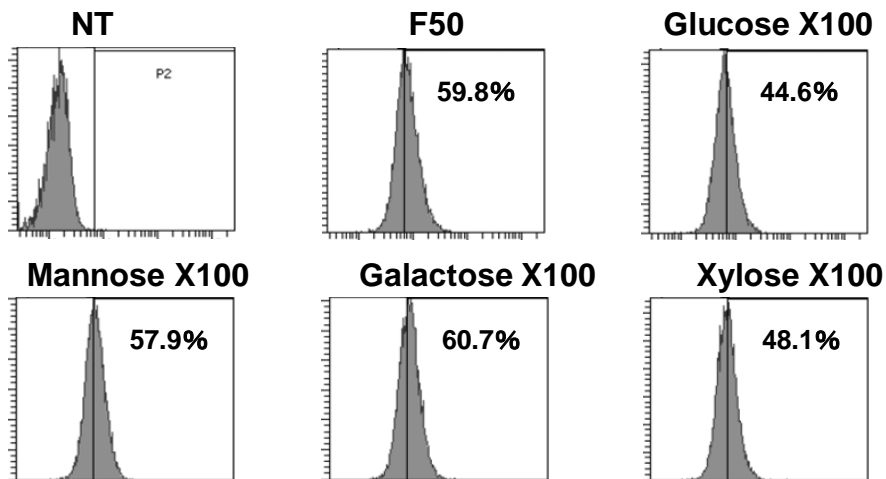

Supplementary Figure 1. Fucose-mediated introduction of Cy5.5 into HCC cell lines.
