# Supplementary material for: Activated p53 with Histone Deacetylase Inhibitor Enhances L-Fucose-Mediated Drug Delivery through Induction of Fucosyltransferase 8 Expression in Hepatocellular Carcinoma Cells
Source: PubMed Central journal article supplement (PMC5158067; doi:10.1371/journal.pone.0168355), 2016-12-15
Supplement: pone.0168355.s002.pdf [file pone.0168355.s002.pdf]

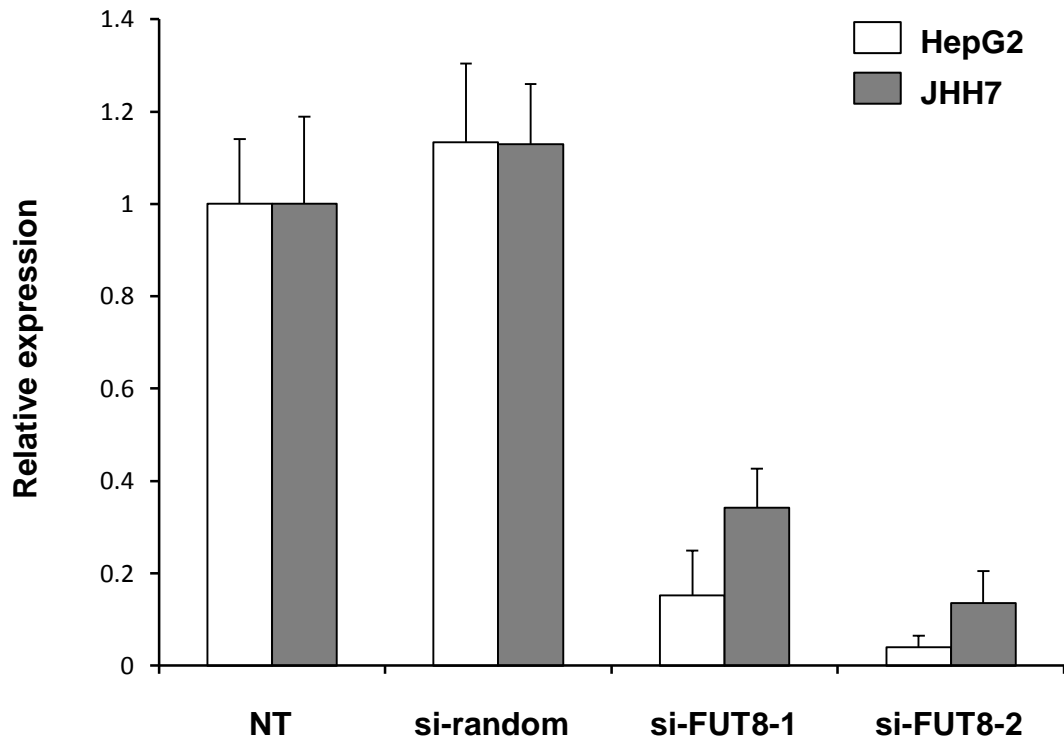

Supplementary Figure 2. Suppression of *FUT8* by introduction of siRNAs.
