# Supplementary material for: Activated p53 with Histone Deacetylase Inhibitor Enhances L-Fucose-Mediated Drug Delivery through Induction of Fucosyltransferase 8 Expression in Hepatocellular Carcinoma Cells
Source: PubMed Central journal article supplement (PMC5158067; doi:10.1371/journal.pone.0168355), 2016-12-15
Supplement: pone.0168355.s003.pdf [file pone.0168355.s003.pdf]

**Supplementary Table 1. Physicochemical properties of Fuc-liposome sorafenib.**

| Fucose concentration in conjugating reaction ( $\mu\text{g/mL}$ ) | 0 (F0) | 25 (F25) | 50 (F50) |
|-------------------------------------------------------------------|--------|----------|----------|
| Lipid concentration (mg/mL) <sup>a</sup>                          | 37.2   | 37.7     | 36.3     |
| Particle size (nm) <sup>b</sup>                                   | 121    | 120      | 116      |
| z potential (mV) <sup>c</sup>                                     | -79    | -82      | -84      |
| sorafenib concentration (mM) <sup>d</sup>                         | 1.1    | 1.1      | 0.9      |
| sorafenib encapsulation efficiency (%) <sup>e</sup>               | 5.0    | 5.0      | 5.0      |
| sorafenib to lipid weight ratio <sup>f</sup>                      | 0.025  | 0.025    | 0.025    |

<sup>a</sup> Total cholesterol was measured using a Cholesterol E-test Wako Kit.

<sup>b</sup> Encapsulation of Sorafenib into liposomes followed by conversion into Sorafenib 0 in TAPS buffer containing NaCl

<sup>c</sup> Determined with a Malvern Nano-S90.

<sup>d</sup> The amount of Sorafenib was measured by spectrophotometer

<sup>e</sup> Encapsulation efficiency was calculated by the following formula:

$$\text{Amount of Sorafenib in liposomes/Initial amount of chemicals} \times 100$$

<sup>f</sup> Sorafenib:lipid weight ratio was calculated by following formula:

$$\text{Sorafenib concentration (mg/mL)/lipid concentration (mg/mL)}.$$
