# Supplementary material for: Activated p53 with Histone Deacetylase Inhibitor Enhances L-Fucose-Mediated Drug Delivery through Induction of Fucosyltransferase 8 Expression in Hepatocellular Carcinoma Cells
Source: PubMed Central journal article supplement (PMC5158067; doi:10.1371/journal.pone.0168355), 2016-12-15
Supplement: pone.0168355.s004.pdf [file pone.0168355.s004.pdf]

**Supplementary Table 2. Patients characteristics**

| No | Age | sex | Tumor size (cm) | Stage | Pathological findings | Child-Pugh | AFP (ng/mL) | L3 (ng/mL) | Viral infection | P53 staining |
|----|-----|-----|-----------------|-------|-----------------------|------------|-------------|------------|-----------------|--------------|
| 1  | 72  | F   | 1               | III   | well                  | 5          | 207.6       | 1.04       | C               | -            |
| 2  | 81  | F   | 4               | III   | mod                   | 5          | 120.1       | 58.2       | C               | -            |
| 3  | 59  | M   | 2.5             | II    | mod                   | 5          | 1046        | 504        | C               | -            |
| 4  | 74  | F   | 5.5             | III   | por                   | 5          | 71.7        | 32         | C               | -            |
| 5  | 62  | M   | 5               | II    | mod                   | 7          | 25.8        | 9.29       | C               | +            |
| 6  | 69  | M   | 6.5             | II    | well                  | 5          | 71          | 4.97       | NBNC            | -            |
| 7  | 61  | F   | 7               | II    | mod                   | 5          | 31.8        | 15.2       | NBNC            | +            |
| 8  | 80  | M   | 8.5             | II    | mod                   | 5          | 27851       | 194.9      | NBNC            | -            |
| 9  | 81  | F   | 8.3             | II    | mod                   | 5          | 267.9       | 180.8      | NBNC            | -            |
| 10 | 77  | M   | 5               | II    | por                   | 5          | 263.6       | 53.2       | NBNC            | -            |
| 11 | 48  | M   | 2.8             | II    | mod                   | 6          | 1084        | 324.11     | C               | -            |
| 12 | 77  | M   | 2.1             | II    | well                  | 5          | 38.4        | 3.22       | C               | +            |
| 13 | 61  | M   | 4               | II    | mod                   | 5          | 357         | 219.56     | C               | -            |
| 14 | 64  | M   | 13              | III   | mod                   | 6          | 28702       | 0          | C               | -            |
