# Supplementary material for: Activated p53 with Histone Deacetylase Inhibitor Enhances L-Fucose-Mediated Drug Delivery through Induction of Fucosyltransferase 8 Expression in Hepatocellular Carcinoma Cells
Source: PubMed Central journal article supplement (PMC5158067; doi:10.1371/journal.pone.0168355), 2016-12-15
Supplement: pone.0168355.s005.pdf [file pone.0168355.s005.pdf]

**Supplementary Table 3. Univariate and stepwise multivariate analysis of p53 expression**

| Characteristics | Number of patients | Univariate analysis |           |              | Multivariate analysis |
|-----------------|--------------------|---------------------|-----------|--------------|-----------------------|
|                 |                    | <i>t</i>            | <i>df</i> | <i>p</i>     |                       |
| Total           | 14                 | 0.083               | 2.894     | 0.940        |                       |
| Male            | 9                  |                     |           |              |                       |
| Female          | 5                  |                     |           |              |                       |
| Age             |                    |                     |           |              |                       |
| Median          | 69                 | -0.488              | 3.724     | 0.653        |                       |
| Range           | (48 - 81)          |                     |           |              |                       |
| ≤70             | 7                  |                     |           |              |                       |
| >70             | 7                  |                     |           |              |                       |
| Histology       |                    | -0.427              | 2.562     | 0.703        |                       |
| well            | 3                  |                     |           |              |                       |
| Moderate        | 9                  |                     |           |              |                       |
| poor            | 2                  |                     |           |              |                       |
| Tumor size (cm) |                    | -0.488              | 4.375     | 0.649        |                       |
| ≤5              | 8                  |                     |           |              |                       |
| >5              | 6                  |                     |           |              |                       |
| Tumor stage     |                    | -2.390              | 10.000    | 0.981        |                       |
| 0 - II          | 10                 |                     |           |              |                       |
| III - IV        | 4                  |                     |           |              |                       |
| Viral infection |                    | 0.090               | 12        | 0.9298       |                       |
| C               | 9                  |                     |           |              |                       |
| NBNC            | 5                  |                     |           |              |                       |
| AFP             |                    | -1.594              | 10.000    | 0.142        |                       |
| Median          | 235.6              |                     |           |              |                       |
| Range           | 25.8 - 28702       |                     |           |              |                       |
| L3-AFP          |                    | -2.742              | 10.100    | <b>0.021</b> | <b>0.0064</b>         |
| Median          | 42.6               |                     |           |              |                       |
| Range           | 0 - 504            |                     |           |              |                       |
| Child-Pugh      |                    | 1.243               | 12        | 0.237        |                       |
| Median          | 5                  |                     |           |              |                       |
| Range           | 5 - 7              |                     |           |              |                       |
